# Supplementary material for: New Type of Papillomavirus and Novel Circular Single Stranded DNA Virus Discovered in Urban Rattus norvegicus Using Circular DNA Enrichment and Metagenomics
Source: PubMed Central journal article supplement (PMC4641689; doi:10.1371/journal.pone.0141952), 2015-11-11

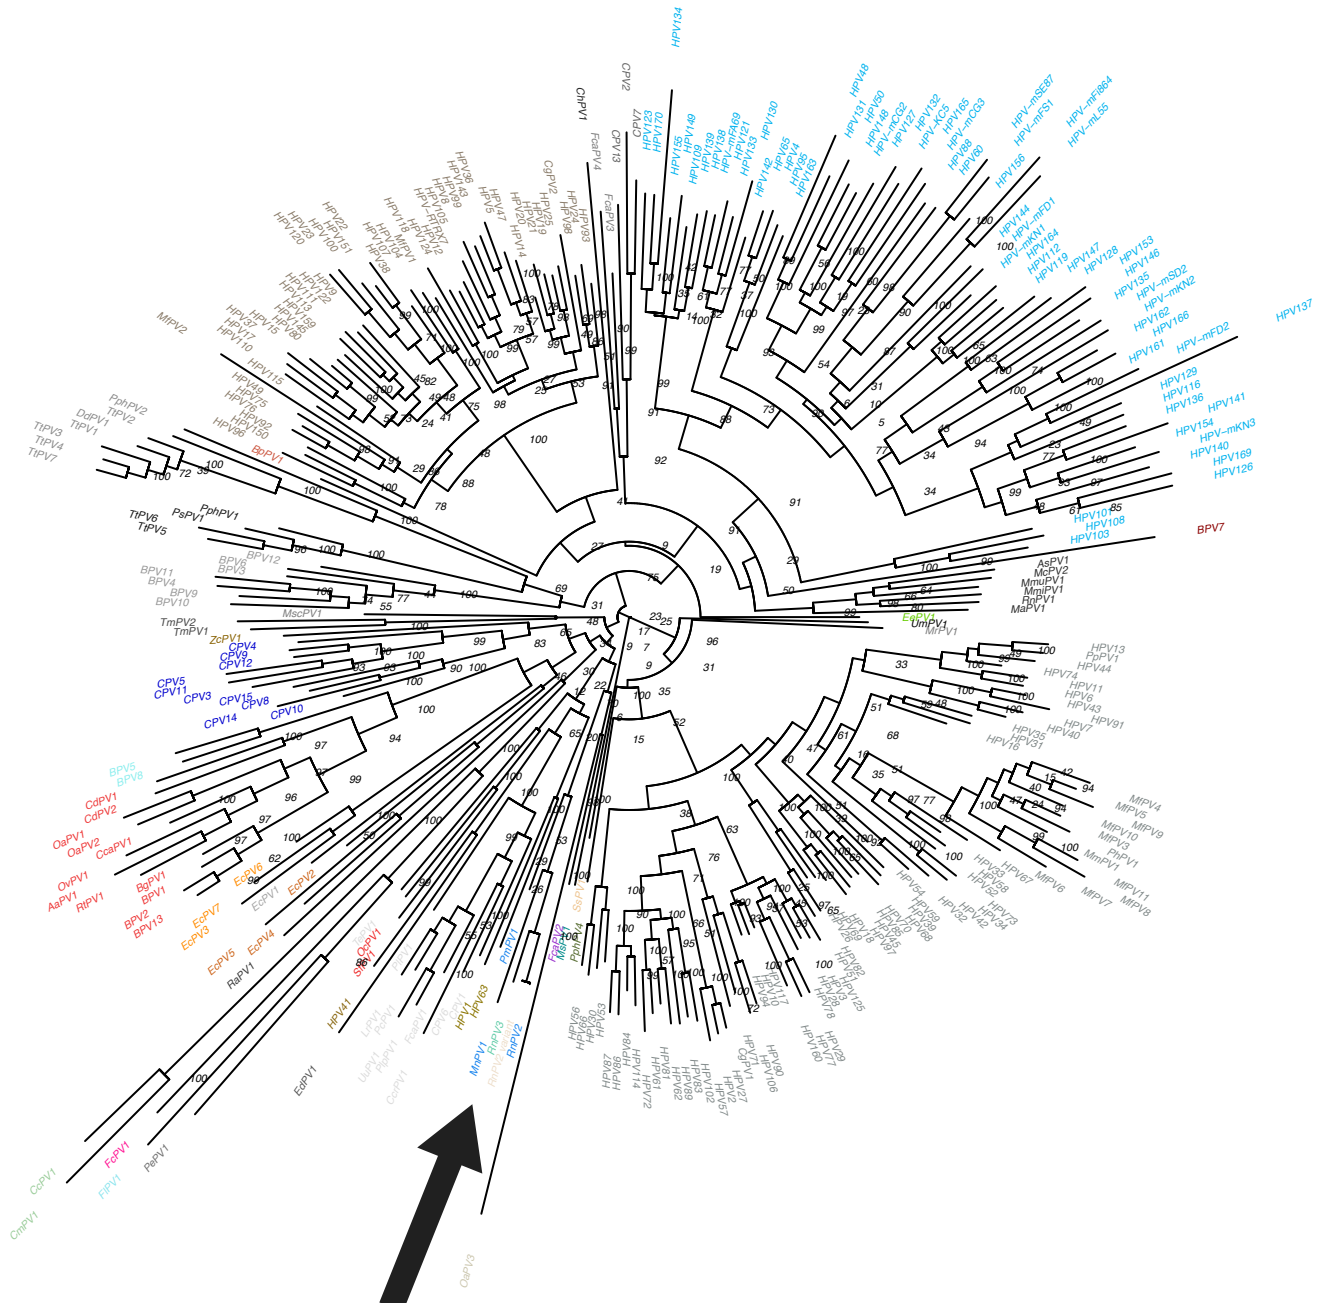

Supplement: pone.0141952.s002.pdf [file pone.0141952.s002.pdf]
